# Supplementary material
Source: PubMed Central journal article supplement (PMC5318256)
Supplement: NIHMS823275-supplement.pdf [file NIHMS823275-supplement.pdf]

**Appendix**  
**Cigarette Smoking and Mortality in Adults Aged 70 Years and Older: Results From the NIH-AARP Cohort**  
**Nash et al.**

**Appendix Table 1.** Age at Smoking Cessation and Mortality, by Sex, in Participants of the NIH-AARP<sup>a</sup> Study Aged Over 70 years

| Cause of death                                              | Smoking status                               |                                                  |                                                   |                                                   |                                                   |                                              |
|-------------------------------------------------------------|----------------------------------------------|--------------------------------------------------|---------------------------------------------------|---------------------------------------------------|---------------------------------------------------|----------------------------------------------|
|                                                             | Current<br>(n=4,706 Males,<br>4,885 Females) | Quit 60-69y<br>(n=4,790 Males,<br>3,622 Females) | Quit 50-59y<br>(n=11,700 Males,<br>7,346 Females) | Quit 40-49y<br>(n=14,304 Males,<br>7,120 Females) | Quit 30-39y<br>(n=15,738 Males,<br>5,815 Females) | Never<br>(n=29,513 Males,<br>31,640 Females) |
| <b>Death from all causes</b>                                |                                              |                                                  |                                                   |                                                   |                                                   |                                              |
| Number of deaths (%)                                        |                                              |                                                  |                                                   |                                                   |                                                   |                                              |
| Males                                                       | 1,726 (36.7)                                 | 1,504 (31.4)                                     | 3,144 (26.9)                                      | 3,149 (22.01)                                     | 2,081 (17.8)                                      | 4,095 (13.9)                                 |
| Females                                                     | 1,449 (29.7)                                 | 839 (23.2)                                       | 1,409 (19.8)                                      | 1,065 (15.0)                                      | 682 (11.7)                                        | 3,283 (10.4)                                 |
| Rate per 100,000                                            |                                              |                                                  |                                                   |                                                   |                                                   |                                              |
| Males                                                       | 6,520.64<br>(6,212.53,<br>6,828.74)          | 5,229.48<br>(4,964.68,<br>5,494.28)              | 4,404.86<br>(4,231.74,<br>4,538.35)               | 3,508.2<br>(3,376.62,<br>3,621.04)                | 2,767.97<br>(2,648.91,<br>2,852.70)               | 2,128.41<br>(2,063.22,<br>2,193.60)          |
| Females                                                     | 5,030.88<br>(4,771.08,<br>5,290.67)          | 3,689.99<br>(3,440.12,<br>3,939.87)              | 3,031.32<br>(2,873, 3,189.65)                     | 2,343.27<br>(2,202.33,<br>2,484.21)               | 1,787.42<br>(1,653.23,<br>1,921.61)               | 1,542.49<br>(1,489.69,<br>1,595.30)          |
| Multivariable-adjusted hazard ratio <sup>b</sup>            |                                              |                                                  |                                                   |                                                   |                                                   |                                              |
| Males                                                       | 1.00 (ref)                                   | 0.80 (0.75, 0.86)                                | 0.67 (0.64, 0.72)                                 | 0.54 (0.51, 0.58)                                 | 0.43 (0.41, 0.46)                                 | 0.33 (0.32, 0.35)                            |
| Females                                                     | 1.00 (ref)                                   | 0.73 (0.67, 0.79)                                | 0.60 (0.56, 0.65)                                 | 0.47 (0.43, 0.51)                                 | 0.36 (0.33, 0.4)                                  | 0.29 (0.28, 0.31)                            |
| <b>Death from lung cancer</b>                               |                                              |                                                  |                                                   |                                                   |                                                   |                                              |
| Number of deaths (%)                                        |                                              |                                                  |                                                   |                                                   |                                                   |                                              |
| Males                                                       | 331 (7.0)                                    | 235 (4.9)                                        | 438 (3.7)                                         | 319 (2.2)                                         | 205 (1.3)                                         | 89 (0.3)                                     |
| Females                                                     | 299 (6.1)                                    | 140 (3.9)                                        | 192 (2.6)                                         | 122 (1.7)                                         | 55 (1.0)                                          | 91 (0.3)                                     |
| Rate per 100,000                                            |                                              |                                                  |                                                   |                                                   |                                                   |                                              |
| Males                                                       | 1,246.51<br>(1,112.01,<br>1,381.00)          | 828.55<br>(722.43, 934.67)                       | 611.97<br>(554.65, 669.29)                        | 354.77<br>(315.84, 393.70)                        | 201.12<br>(173.58, 228.65)                        | 46.19<br>(36.59, 55.78)                      |
| Females                                                     | 1,028.29<br>(911.43,<br>1,145.15)            | 619.44<br>(516.76, 722.12)                       | 412.5<br>(354.13, 470.86)                         | 267.26<br>(219.79, 314.74)                        | 143.42<br>(105.51, 181.34)                        | 42.85<br>(34.04, 51.67)                      |
| Multivariable-adjusted hazard ratio <sup>b</sup>            |                                              |                                                  |                                                   |                                                   |                                                   |                                              |
| Males                                                       | 1.00 (ref)                                   | 0.67 (0.57, 0.79)                                | 0.50 (0.43, 0.58)                                 | 0.29 (0.25, 0.34)                                 | 0.17 (0.14, 0.20)                                 | 0.04 (0.03, 0.05)                            |
| Females                                                     | 1.00 (ref)                                   | 0.61 (0.50, 0.74)                                | 0.40 (0.34, 0.48)                                 | 0.26 (0.21, 0.32)                                 | 0.14 (0.11, 0.19)                                 | 0.04 (0.03, 0.05)                            |
| <b>Death from other smoking related cancers<sup>c</sup></b> |                                              |                                                  |                                                   |                                                   |                                                   |                                              |
| Number of deaths (%)                                        |                                              |                                                  |                                                   |                                                   |                                                   |                                              |
| Males                                                       | 93 (2.0)                                     | 67 (1.4)                                         | 175 (1.5)                                         | 177 (1.2)                                         | 178 (1.1)                                         | 222 (0.8)                                    |
| Females                                                     | 55 (1.1)                                     | 21 (0.6)                                         | 63 (0.9)                                          | 49 (0.7)                                          | 20 (0.3)                                          | 135 (0.4)                                    |

**Appendix**  
**Cigarette Smoking and Mortality in Adults Aged 70 Years and Older: Results From the NIH-AARP Cohort**  
**Nash et al.**

|                                                  |                      |                      |                      |                    |                   |                   |  |
|--------------------------------------------------|----------------------|----------------------|----------------------|--------------------|-------------------|-------------------|--|
| Rate per 100,000                                 |                      |                      |                      |                    |                   |                   |  |
| Males                                            | 608.29               | 462.7                | 452.94               | 398.16             | 355.39            | 267.62            |  |
|                                                  | (514.49, 702.09)     | (383.9, 541.5)       | (403.61, 502.27)     | (356.92, 439.41)   | (318.77, 392.00)  | (244.51, 290.74)  |  |
| Females                                          | 353.5                | 230.44               | 238.03               | 239.24             | 158.49            | 166.9             |  |
|                                                  | (285, 422)           | (167.75, 293.12)     | (193.74, 282.33)     | (194.47, 284.02)   | (118.71, 198.27)  | (149.45, 184.35)  |  |
| Multivariable-adjusted hazard ratio <sup>b</sup> |                      |                      |                      |                    |                   |                   |  |
| Males                                            | 1.00 (ref)           | 0.75 (0.58, 0.97)    | 0.77 (0.63, 0.95)    | 0.64 (0.52, 0.79)  | 0.58 (0.47, 0.71) | 0.41 (0.33, 0.50) |  |
| Females                                          | 1.00 (ref)           | 0.75 (0.51, 1.10)    | 0.64 (0.46, 0.89)    | 0.68 (0.49, 0.95)  | 0.52 (0.36, 0.75) | 0.48 (0.36, 0.62) |  |
| Death from respiratory infection                 |                      |                      |                      |                    |                   |                   |  |
| Number of deaths (%)                             |                      |                      |                      |                    |                   |                   |  |
| Males                                            | 263 (5.6)            | 229 (4.8)            | 357 (3.1)            | 255 (1.8)          | 167 (1.1)         | 130 (0.4)         |  |
| Females                                          | 277 (5.7)            | 165 (4.6)            | 245 (3.3)            | 114 (1.6)          | 39 (0.7)          | 127 (0.4)         |  |
| Rate per 100,000                                 |                      |                      |                      |                    |                   |                   |  |
| Males                                            | 996.12               | 798.15               | 497.9                | 283.1              | 163.86            | 67.64             |  |
|                                                  | (875.54, 1,116.69)   | (694.58, 901.72)     | (446.25, 549.56)     | (248.35, 317.85)   | (139, 188.72)     | (56.01, 79.27)    |  |
| Females                                          | 969.06               | 729.18               | 528.68               | 250.68             | 103.05            | 59.38             |  |
|                                                  | (854.64, 1083.49)    | (617.84, 840.52)     | (462.46, 594.90)     | (204.59, 296.78)   | (70.7, 135.4)     | (49.04, 69.71)    |  |
| Multivariable-adjusted hazard ratio <sup>b</sup> |                      |                      |                      |                    |                   |                   |  |
| Males                                            | 1.00 (ref)           | 0.81 (0.67, 0.96)    | 0.51 (0.43, 0.59)    | 0.30 (0.25, 0.35)  | 0.18 (0.14, 0.21) | 0.07 (0.06, 0.09) |  |
| Females                                          | 1.00 (ref)           | 0.75 (0.62, 0.91)    | 0.55 (0.46, 0.65)    | 0.26 (0.21, 0.33)  | 0.11 (0.08, 0.15) | 0.06 (0.05, 0.07) |  |
| Death from heart disease                         |                      |                      |                      |                    |                   |                   |  |
| Number of deaths (%)                             |                      |                      |                      |                    |                   |                   |  |
| Males                                            | 411 (8.7)            | 377 (7.9)            | 894 (7.6)            | 915 (6.4)          | 777 (4.9)         | 1,257 (4.3)       |  |
| Females                                          | 311 (6.4)            | 188 (5.2)            | 316 (4.3)            | 244 (3.4)          | 162 (2.8)         | 815 (2.6)         |  |
| Rate per 100,000                                 |                      |                      |                      |                    |                   |                   |  |
| Males                                            | 1,554.8              | 1,307.17             | 1,245.52             | 1,016.55           | 763.66            | 653.35            |  |
|                                                  | (1,404.23, 1,705.36) | (1,174.96, 1,439.37) | (1,163.86, 1,327.17) | (950.68, 1,082.42) | (709.95, 817.37)  | (617.23, 689.47)  |  |
| Females                                          | 1,083.88             | 821                  | 680.01               | 537.85             | 426.25            | 381.39            |  |
|                                                  | (963.02, 1,204.75)   | (703.56, 938.44)     | (605.01, 755)        | (470.27, 605.42)   | (360.59, 491.90)  | (355.19, 407.60)  |  |
| Multivariable-adjusted hazard ratio <sup>b</sup> |                      |                      |                      |                    |                   |                   |  |
| Males                                            | 1.00 (ref)           | 0.83 (0.73, 0.96)    | 0.80 (0.71, 0.90)    | 0.66 (0.59, 0.74)  | 0.50 (0.45, 0.57) | 0.43 (0.38, 0.48) |  |
| Females                                          | 1.00 (ref)           | 0.75 (0.63, 0.90)    | 0.62 (0.53, 0.73)    | 0.50 (0.42, 0.59)  | 0.40 (0.33, 0.49) | 0.33 (0.29, 0.38) |  |
| Death from stroke                                |                      |                      |                      |                    |                   |                   |  |
| Number of deaths (%)                             |                      |                      |                      |                    |                   |                   |  |

**Appendix**  
**Cigarette Smoking and Mortality in Adults Aged 70 Years and Older: Results From the NIH-AARP Cohort**  
**Nash et al.**

|                                                  |                  |                   |                   |                   |                   |                   |
|--------------------------------------------------|------------------|-------------------|-------------------|-------------------|-------------------|-------------------|
| Males                                            | 68 (1.4)         | 57 (1.2)          | 119 (1.0)         | 131 (0.9)         | 139 (0.9)         | 209 (0.7)         |
| Females                                          | 64 (1.3)         | 27 (0.8)          | 59 (0.8)          | 58 (0.8)          | 41 (0.7)          | 246 (0.8)         |
| Rate per 100,000                                 |                  |                   |                   |                   |                   |                   |
| Males                                            | 259.78           | 196.07            | 165.66            | 145.5             | 136.4             | 108.73            |
|                                                  | (197.94, 321.62) | (145.08, 247.05)  | (135.89, 195.43)  | (120.58, 170.42)  | (113.72, 159.08)  | (93.99, 123.48)   |
| Females                                          | 227.04           | 118.44            | 127.72            | 129.21            | 107.35            | 115.29            |
|                                                  | (171.24, 282.84) | (73.73, 163.15)   | (95.12, 160.32)   | (95.92, 162.50)   | (74.48, 140.21)   | (100.87, 129.71)  |
| Multivariable-adjusted hazard ratio <sup>b</sup> |                  |                   |                   |                   |                   |                   |
| Males                                            | 1.00 (ref)       | 0.75 (0.53, 1.07) | 0.64 (0.48, 0.86) | 0.57 (0.42, 0.76) | 0.54 (0.40, 0.72) | 0.43 (0.32, 0.56) |
| Females                                          | 1.00 (ref)       | 0.52 (0.33, 0.81) | 0.57 (0.40, 0.81) | 0.57 (0.40, 0.82) | 0.48 (0.32, 0.71) | 0.48 (0.36, 0.64) |

<sup>a</sup>NIH-AARP: National Institutes of Health-AARP Study

<sup>b</sup>Multivariable-adjusted hazard ratios adjusted for age at baseline, sex, education level, and alcohol use

<sup>c</sup>Other smoking cancers to include all other cancers determined by the Surgeon General's report to be causally associated with cancer, including bladder, esophageal, stomach, head and neck, colorectal, kidney and renal pelvis, and pancreatic cancers, and acute myeloid leukemia.

**Appendix**  
**Cigarette Smoking and Mortality in Adults Aged 70 Years and Older: Results From the NIH-AARP Cohort**  
**Nash et al.**

**Appendix Table 2.** Time Since Smoking Cessation and Mortality Among NIH-AARP Study Participants Aged Over 70y

| Cause of death                                        | Smoking status                    |                                 |                                   |                                  |                      |
|-------------------------------------------------------|-----------------------------------|---------------------------------|-----------------------------------|----------------------------------|----------------------|
|                                                       | Current <sup>a</sup><br>(n=9,849) | Quit 1-4 years ago<br>(n=1,718) | Quit 5-10 years ago<br>(n=46,414) | Quit 10+ years ago<br>(n=72,109) | Never<br>(n=60,973)  |
| Death from all causes                                 |                                   |                                 |                                   |                                  |                      |
| Number of deaths (%)                                  | 3,243 (32.9)                      | 518 (30.2)                      | 1,151 (26.1)                      | 13,283 (18.4)                    | 7,378 (12.1)         |
|                                                       | 5,870.2                           | 5,798.75                        | 4,465.41                          | 2,769.32                         | 1,880.01             |
| Rate per 100,000                                      | (5,664.05, 6,076.34)              | (5,247.49, 6,350.01)            | (4,204.39, 4,726.44)              | (2,721.1, 2,817.53)              | (1,836.23, 1,923.79) |
| Multivariable-adjusted hazard ratio <sup>b</sup>      | 1.00 (ref)                        | 1.35 (1.26, 1.46)               | 1.07 (1.01, 1.14)                 | 0.66 (0.64, 0.69)                | 0.44 (0.42, 0.46)    |
| Excluding previous conditions                         | 1.00 (ref)                        | 1.41 (0.89, 2.22)               | 0.88 (0.58, 1.34)                 | 0.8 (0.67, 0.95)                 | 0.67 (0.55, 0.81)    |
| Death from lung cancer                                |                                   |                                 |                                   |                                  |                      |
| Number of deaths (%)                                  | 641 (6.5)                         | 112 (6.5)                       | 191 (4.3)                         | 1,344 (1.9)                      | 180 (0.3)            |
|                                                       | 1,145.83                          | 1,186.64                        | 725                               | 284.75                           | 44.75                |
| Rate per 100,000                                      | (1,055.26, 1,236.4)               | (946.61, 1,426.67)              | (621.05, 828.95)                  | (269.15, 300.34)                 | (38.07, 51.43)       |
| Multivariable-adjusted hazard ratio                   | 1.00 (ref)                        | 1.91 (1.61, 2.25)               | 1.19 (1.02, 1.39)                 | 0.48 (0.44, 0.52)                | 0.08 (0.06, 0.09)    |
| Excluding previous conditions                         | 1.00 (ref)                        | 1.76 (1.26, 2.47)               | 1.27 (0.95, 1.71)                 | 0.49 (0.41, 0.57)                | 0.10 (0.07, 0.12)    |
| Death from other smoking related cancers <sup>c</sup> |                                   |                                 |                                   |                                  |                      |
| Number of deaths (%)                                  | 209 (2.1)                         | 29 (1.7)                        | 84 (1.9)                          | 1143 (1.6)                       | 619 (1.0)            |
|                                                       | 390.55                            | 374.46                          | 326.34                            | 229.9                            | 161.18               |
| Rate per 100,000                                      | (336.64, 444.47)                  | (223.98, 524.93)                | (255.66, 397.03)                  | (216.31, 243.49)                 | (148.25, 174.12)     |
| Multivariable-adjusted hazard ratio                   | 1.00 (ref)                        | 1.29 (1, 1.67)                  | 1.08 (0.87, 1.33)                 | 0.81 (0.73, 0.9)                 | 0.62 (0.56, 0.7)     |
| Excluding previous conditions                         | 1.00 (ref)                        | 1.41 (0.89, 2.22)               | 0.88 (0.58, 1.34)                 | 0.80 (0.67, 0.95)                | 0.67 (0.55, 0.81)    |
| Death from respiratory infection                      |                                   |                                 |                                   |                                  |                      |
| Number of deaths (%)                                  | 547 (5.6)                         | 85 (4.9)                        | 197 (4.5)                         | 1,181 (1.6)                      | 257 (0.4)            |
|                                                       | 971.6                             | 964.72                          | 752.52                            | 255.94                           | 64.07                |
| Rate per 100,000                                      | (888.48, 1,054.73)                | (738.91, 1,190.52)              | (646.36, 858.69)                  | (240.95, 270.92)                 | (56.06, 72.07)       |
| Multivariable-adjusted hazard ratio                   | 1.00 (ref)                        | 1.68 (1.4, 2.01)                | 1.36 (1.16, 1.58)                 | 0.46 (0.42, 0.51)                | 0.11 (0.1, 0.13)     |
| Excluding previous conditions                         | 1.00 (ref)                        | 2.02 (1.34, 3.05)               | 0.89 (0.57, 1.38)                 | 0.43 (0.35, 0.53)                | 0.19 (0.15, 0.24)    |
| Death from heart disease                              |                                   |                                 |                                   |                                  |                      |
| Number of deaths (%)                                  | 741 (7.5)                         | 121 (7.0)                       | 261 (5.9)                         | 3,570 (5.0)                      | 2,072 (3.4)          |
|                                                       | 1,357.85                          | 1,316                           | 1,028.76                          | 730.86                           | 538.39               |
| Rate per 100,000                                      | (1,258.15, 1,457.55)              | (1,060.42, 1,571.58)            | (902.61, 1,154.91)                | (706.35, 755.36)                 | (514.76, 562.02)     |
| Multivariable-adjusted hazard ratio                   | 1.00 (ref)                        | 1.30 (1.12, 1.52)               | 1.00 (0.88, 1.14)                 | 0.71 (0.67, 0.76)                | 0.51 (0.47, 0.55)    |
| Excluding previous conditions                         | 1.00 (ref)                        | 1.15 (0.84, 1.59)               | 0.87 (0.67, 1.14)                 | 0.63 (0.56, 0.71)                | 0.53 (0.47, 0.60)    |
| Death from stroke                                     |                                   |                                 |                                   |                                  |                      |
| Number of deaths (%)                                  | 134 (1.4)                         | 14 (0.8)                        | 44 (1.0)                          | 589 (0.8)                        | 455 (0.7)            |

**Appendix**  
**Cigarette Smoking and Mortality in Adults Aged 70 Years and Older: Results From the NIH-AARP Cohort**  
**Nash et al.**

|                                     |                            |                           |                           |                            |                            |
|-------------------------------------|----------------------------|---------------------------|---------------------------|----------------------------|----------------------------|
| Rate per 100,000                    | 244.28<br>(202.11, 286.45) | 176.24<br>(75.88, 276.61) | 178.2<br>(124.45, 231.94) | 123.66<br>(113.42, 133.89) | 111.31<br>(100.85, 121.77) |
| Multivariable-adjusted hazard ratio | 1.00 (ref)                 | 1.01 (0.68, 1.49)         | 0.94 (0.7, 1.27)          | 0.62 (0.53, 0.72)          | 0.54 (0.46, 0.63)          |
| Excluding previous conditions       | 1.00 (ref)                 | 0.74 (0.34, 1.59)         | 0.65 (0.36, 1.18)         | 0.57 (0.45, 0.71)          | 0.50 (0.4, 0.64)           |

<sup>a</sup>Current smokers includes participants who reported quitting smoking in the past year

<sup>b</sup>Multivariable-adjusted hazard ratios adjusted for age at baseline, sex, education level, and alcohol use

<sup>c</sup>Other smoking cancers to include all other cancers determined by the Surgeon General's report to be causally associated with cancer, including bladder, esophageal, stomach, head and neck, colorectal, kidney and renal pelvis, and pancreatic cancers, and acute myeloid leukemia.

NIH-AARP, National Institutes of Health-AARP Study

**Appendix**  
**Cigarette Smoking and Mortality in Adults Aged 70 Years and Older: Results From the NIH-AARP Cohort**  
**Nash et al.**

**Appendix Table 3.** Lifetime Smoking History and Mortality in Current and Former Smokers Participating in the NIH-AARP<sup>a</sup> Study, Aged Over 70 Years

| Cause of death                                        | Lifetime pack-years of smoking (Quartile) |                                  |                                  |                                  |
|-------------------------------------------------------|-------------------------------------------|----------------------------------|----------------------------------|----------------------------------|
|                                                       | 1<br>(n=23,726)                           | 2<br>(n=24,476)                  | 3<br>(n=24,294)                  | 4<br>(n=24,566)                  |
| Pack years of smoking, mean (SD)                      | 3.17 (1.96)                               | 12.84 (3.7)                      | 27.70 (5.05)                     | 57.96 (18.65)                    |
| Death from all causes                                 |                                           |                                  |                                  |                                  |
| Number of deaths (%)                                  |                                           |                                  |                                  |                                  |
| Current smokers                                       | 78 (19.0)                                 | 329 (21.4)                       | 771 (29.2)                       | 1,997 (39.9)                     |
| Former smokers                                        | 3,238 (13.9)                              | 3,719 (16.2)                     | 4,489 (20.7)                     | 5,572 (28.5)                     |
| Rate per 100,000                                      |                                           |                                  |                                  |                                  |
| Current smokers                                       | 2,988.03<br>(2,324.35, 3,651.7)           | 3,369.67<br>(3,005.37, 3,733.97) | 5,001.41<br>(4,646.25, 5,356.57) | 6,997.6<br>(6,690.35, 7,304.85)  |
| Former smokers                                        | 2,117.74<br>(2,044.8, 2,190.69)           | 2,498.45<br>(2,418.14, 2,578.75) | 3,272.84<br>(3,177.1, 3,368.59)  | 4,747.02<br>(4,622.35, 4,871.68) |
| Multivariable-adjusted hazard ratio <sup>b</sup>      |                                           |                                  |                                  |                                  |
| Current smokers                                       | 1.00 (ref)                                | 1.13 (0.88, 1.45)                | 1.68 (1.33, 2.12)                | 2.33 (1.86, 2.92)                |
| Former smokers                                        | 1.00 (ref)                                | 1.18 (1.12, 1.23)                | 1.53 (1.46, 1.60)                | 2.18 (2.09, 2.28)                |
| Death from lung cancer                                |                                           |                                  |                                  |                                  |
| Number of deaths (%)                                  |                                           |                                  |                                  |                                  |
| Current smokers                                       | 10 (2.4)                                  | 49 (3.2)                         | 131 (5.0)                        | 440 (8.8)                        |
| Former smokers                                        | 153 (0.7)                                 | 284 (1.2)                        | 535 (2.5)                        | 852 (4.4)                        |
| Rate per 100,000                                      |                                           |                                  |                                  |                                  |
| Current smokers                                       | 380.52<br>(144.59, 616.44)                | 499.49<br>(359.57, 639.42)       | 840.24<br>(695.43, 985.04)       | 1,549.04<br>(1,404.14, 1,693.93) |
| Former smokers                                        | 100.07<br>(84.21, 115.92)                 | 191.62<br>(169.37, 213.87)       | 390.37<br>(357.29, 423.45)       | 724.01<br>(675.39, 772.64)       |
| Multivariable-adjusted hazard ratio                   |                                           |                                  |                                  |                                  |
| Current smokers                                       | 1.00 (ref)                                | 1.32 (0.67, 2.60)                | 2.2 (1.15, 4.18)                 | 4.13 (2.20, 7.73)                |
| Former smokers                                        | 1.00 (ref)                                | 1.88 (1.55, 2.29)                | 3.77 (3.15, 4.51)                | 6.85 (5.76, 8.14)                |
| Death from other smoking related cancers <sup>c</sup> |                                           |                                  |                                  |                                  |
| Number of deaths (%)                                  |                                           |                                  |                                  |                                  |
| Current smokers                                       | 4 (1.0)                                   | 18 (1.2)                         | 33 (1.3)                         | 93 (1.9)                         |
| Former smokers                                        | 181 (0.8)                                 | 223 (1.0)                        | 246 (1.1)                        | 248 (1.3)                        |
| Rate per 100,000                                      |                                           |                                  |                                  |                                  |
| Current smokers                                       | 389.2<br>(147.92, 630.48)                 | 299.78<br>(190.62, 408.95)       | 473.62<br>(365.03, 582.21)       | 535.1<br>(449.94, 620.25)        |
| Former smokers                                        | 241.49<br>(216.85, 266.13)                | 298.39<br>(270.63, 326.15)       | 356.7<br>(325.08, 388.32)        | 423.58<br>(386.37, 460.79)       |
| Multivariable-adjusted hazard ratio                   |                                           |                                  |                                  |                                  |

**Appendix**  
**Cigarette Smoking and Mortality in Adults Aged 70 Years and Older: Results From the NIH-AARP Cohort**  
**Nash et al.**

|                                     |                               |                            |                              |                                  |
|-------------------------------------|-------------------------------|----------------------------|------------------------------|----------------------------------|
| Current smokers                     | 1.00 (ref)                    | 0.77 (0.37, 1.57)          | 1.23 (0.64, 2.38)            | 1.32 (0.69, 2.50)                |
| Former smokers                      | 1.00 (ref)                    | 1.22 (1.07, 1.40)          | 1.45 (1.27, 1.66)            | 1.7 (1.48, 1.94)                 |
| Death from respiratory infection    |                               |                            |                              |                                  |
| Number of deaths (%)                |                               |                            |                              |                                  |
| Current smokers                     | 11 (2.7)                      | 34 (2.2)                   | 121 (4.6)                    | 374 (7.5)                        |
| Former smokers                      | 151 (0.7)                     | 248 (1.1)                  | 477 (2.2)                    | 808 (4.1)                        |
| Rate per 100,000                    |                               |                            |                              |                                  |
| Current smokers                     | 413.38<br>(168.61, 658.16)    | 348.32<br>(231.17, 465.46) | 787.09<br>(646.06, 928.12)   | 1,302.94<br>(1,170.75, 1,435.12) |
| Former smokers                      | 98.74<br>(82.99, 114.49)      | 166.51<br>(145.79, 187.24) | 347.66<br>(316.46, 378.86)   | 687.88<br>(640.44, 735.32)       |
| Multivariable-adjusted hazard ratio |                               |                            |                              |                                  |
| Current smokers                     | 1.00 (ref)                    | 0.83 (0.42, 1.64)          | 1.89 (1.02, 3.51)            | 3.13 (1.72, 5.71)                |
| Former smokers                      | 1.00 (ref)                    | 1.67 (1.36, 2.04)          | 3.43 (2.85, 4.12)            | 6.6 (5.54, 7.86)                 |
| Death from heart disease            |                               |                            |                              |                                  |
| Number of deaths (%)                |                               |                            |                              |                                  |
| Current smokers                     | 28 (6.8)                      | 79 (5.1)                   | 177 (6.7)                    | 438 (8.8)                        |
| Former smokers                      | 834 (3.6)                     | 1,036 (4.5)                | 1,179 (5.4)                  | 1,463 (7.5)                      |
| Rate per 100,000                    |                               |                            |                              |                                  |
| Current smokers                     | 1,083.2<br>(681.86, 1,484.53) | 807.95<br>(629.69, 986.2)  | 1,137.1<br>(968.51, 1,305.7) | 1,530.86<br>(1,387.33, 1,674.39) |
| Former smokers                      | 545.21<br>(508.2, 582.21)     | 695.84<br>(653.47, 738.21) | 859.33<br>(810.28, 908.39)   | 1,247.76<br>(1,183.81, 1,311.71) |
| Multivariable-adjusted hazard ratio |                               |                            |                              |                                  |
| Current smokers                     | 1.00 (ref)                    | 0.75 (0.49, 1.16)          | 1.07 (0.72, 1.6)             | 1.41 (0.96, 2.06)                |
| Former smokers                      | 1.00 (ref)                    | 1.28 (1.17, 1.4)           | 1.57 (1.43, 1.71)            | 2.25 (2.06, 2.45)                |
| Death from stroke                   |                               |                            |                              |                                  |
| Number of deaths (%)                |                               |                            |                              |                                  |
| Current smokers                     | 3 (0.7)                       | 16 (1.0)                   | 37 (1.4)                     | 76 (1.5)                         |
| Former smokers                      | 198 (0.9)                     | 171 (0.8)                  | 200 (0.9)                    | 193 (1.0)                        |
| Rate per 100,000                    |                               |                            |                              |                                  |
| Current smokers                     | 115.75<br>(-15.27, 246.77)    | 163.72<br>(83.47, 243.98)  | 251.12<br>(169.85, 332.38)   | 263.57<br>(204.25, 322.9)        |
| Former smokers                      | 129.52<br>(111.48, 147.57)    | 114.77<br>(97.56, 131.97)  | 145.7<br>(125.51, 165.89)    | 164.79<br>(141.54, 188.04)       |
| Multivariable-adjusted hazard ratio |                               |                            |                              |                                  |
| Current smokers                     | 1.00 (ref)                    | 1.45 (0.42, 4.97)          | 2.25 (0.69, 7.31)            | 2.35 (0.74, 7.46)                |
| Former smokers                      | 1.00 (ref)                    | 0.89 (0.72, 1.09)          | 1.12 (0.92, 1.36)            | 1.25 (1.02, 1.52)                |

<sup>a</sup>NIH-AARP: National Institutes of Health-AARP Study

<sup>b</sup>Multivariable-adjusted hazard ratios adjusted for age at baseline, sex, education level, and alcohol use

**Appendix**  
**Cigarette Smoking and Mortality in Adults Aged 70 Years and Older: Results From the NIH-AARP Cohort**  
**Nash et al.**

<sup>c</sup>Other smoking cancers to include all other cancers determined by the Surgeon General's report to be causally associated with cancer, including bladder, esophageal, stomach, head and neck, colorectal, kidney and renal pelvis, and pancreatic cancers, and acute myeloid leukemia.

**Appendix**  
**Cigarette Smoking and Mortality in Adults Aged 70 Years and Older: Results From the NIH-AARP Cohort**  
**Nash et al.**

**Appendix Table 4.** Amount Smoked Aged Over 70 and Mortality Among Current Smokers in the NIH-AARP<sup>a</sup> Study

| Cause of death                                              | Amount smoked per day |                      |                      |                      |                      |
|-------------------------------------------------------------|-----------------------|----------------------|----------------------|----------------------|----------------------|
|                                                             | ≤10/d<br>(n=3,816)    | 11-20/d<br>(n=3,269) | 21-30/d<br>(n=1,357) | 31-40/d<br>(n=709)   | 40+/d<br>(n=440)     |
| <b>Death from all causes</b>                                |                       |                      |                      |                      |                      |
| Number of deaths (%)                                        | 1,091 (28.6)          | 1,095 (33.5)         | 516 (38.0)           | 308 (43.4)           | 165 (37.5)           |
|                                                             | 4,699.21              | 5,845.76             | 6,666.64             | 7,952.04             | 6,507.98             |
| Rate per 100,000                                            | (4,419.98, 4,978.44)  | (5,498.24, 6,193.28) | (6,089.17, 7,244.11) | (7,054.09, 8,849.99) | (5,467, 7,548.96)    |
| Multivariable-adjusted hazard ratio <sup>b</sup>            | 1.00 (ref)            | 1.23 (1.13, 1.34)    | 1.39 (1.25, 1.54)    | 1.64 (1.44, 1.86)    | 1.29 (1.09, 1.52)    |
| + age at initiation                                         | 1.00 (ref)            | 1.21 (1.12, 1.32)    | 1.36 (1.22, 1.51)    | 1.59 (1.4, 1.81)     | 1.34 (1.13, 1.58)    |
| + pack-years under the age of 70y                           | 1.00 (ref)            | 1.11 (1.01, 1.21)    | 1.09 (0.97, 1.22)    | 1.13 (0.98, 1.31)    | 0.87 (0.72, 1.05)    |
| <b>Death from lung cancer</b>                               |                       |                      |                      |                      |                      |
| Number of deaths (%)                                        | 187 (4.9)             | 222 (6.8)            | 120 (8.8)            | 68 (9.6)             | 33 (7.5)             |
|                                                             | 804.87                | 1,177.3              | 1,538.65             | 1,784.53             | 1,347.67             |
| Rate per 100,000                                            | (689.36, 920.39)      | (1,021.94, 1,332.66) | (1,262.33, 1,814.97) | (1,356.28, 2,212.78) | (865.96, 1,829.38)   |
| Multivariable-adjusted hazard ratio                         | 1.00 (ref)            | 1.44 (1.19, 1.75)    | 1.88 (1.5, 2.37)     | 2.13 (1.61, 2.81)    | 1.54 (1.06, 2.23)    |
| + age at initiation                                         | 1.00 (ref)            | 1.41 (1.16, 1.72)    | 1.82 (1.45, 2.3)     | 2.05 (1.55, 2.71)    | 1.66 (1.14, 2.41)    |
| + pack-years under the age of 70y                           | 1.00 (ref)            | 1.21 (0.99, 1.48)    | 1.28 (0.99, 1.64)    | 1.16 (0.84, 1.6)     | 0.77 (0.5, 1.18)     |
| <b>Death from other smoking related cancers<sup>c</sup></b> |                       |                      |                      |                      |                      |
| Number of deaths (%)                                        | 48 (1.3)              | 59 (1.8)             | 21 (1.6)             | 15 (2.1)             | 5 (1.1)              |
|                                                             | 206.88                | 314.96               | 274.57               | 355.77               | 171.33               |
| Rate per 100,000                                            | (148.29, 265.46)      | (234.36, 395.55)     | (156.83, 392.31)     | (173.98, 537.55)     | (17.39, 325.28)      |
| Multivariable-adjusted hazard ratio                         | 1.00 (ref)            | 1.33 (1, 1.76)       | 1.07 (0.72, 1.57)    | 1.25 (0.77, 2)       | 1.13 (0.63, 2.03)    |
| + age at initiation                                         | 1.00 (ref)            | 1.29 (0.97, 1.73)    | 1.00 (0.66, 1.53)    | 1.13 (0.66, 1.93)    | 1.04 (0.55, 1.95)    |
| + pack-years under the age of 70y                           | 1.00 (ref)            | 1.33 (1, 1.76)       | 1.06 (0.71, 1.56)    | 1.23 (0.76, 1.98)    | 1.16 (0.65, 2.09)    |
| <b>Death from respiratory infection</b>                     |                       |                      |                      |                      |                      |
| Number of deaths (%)                                        | 169 (4.4)             | 187 (5.7)            | 88 (6.5)             | 63 (8.9)             | 33 (7.5)             |
|                                                             | 722.03                | 998.71               | 1,149.48             | 1,669.94             | 1,318.54             |
| Rate per 100,000                                            | (613.04, 831.02)      | (854.99, 1,142.43)   | (908.27, 1,390.69)   | (1,252.48, 2,087.4)  | (849.33, 1,787.75)   |
| Multivariable-adjusted hazard ratio                         | 1.00 (ref)            | 1.35 (1.09, 1.66)    | 1.54 (1.19, 1.99)    | 2.19 (1.63, 2.93)    | 1.71 (1.17, 2.49)    |
| + age at initiation                                         | 1.00 (ref)            | 1.3 (1.05, 1.6)      | 1.45 (1.12, 1.88)    | 1.99 (1.49, 2.67)    | 1.75 (1.2, 2.55)     |
| + pack-years under the age of 70y                           | 1.00 (ref)            | 1.11 (0.90, 1.37)    | 0.98 (0.74, 1.29)    | 1.09 (0.78, 1.51)    | 0.74 (0.47, 1.15)    |
| <b>Death from heart disease</b>                             |                       |                      |                      |                      |                      |
| Number of deaths (%)                                        | 238 (6.2)             | 265 (8.1)            | 118 (8.7)            | 63 (8.9)             | 38 (8.6)             |
|                                                             | 1,030.18              | 1,410.46             | 1,517.5              | 1,571.13             | 1544                 |
| Rate per 100,000                                            | (899.08, 1,161.27)    | (1,240.02, 1,580.9)  | (1,242.68, 1,792.33) | (1,179.21, 1,963.04) | (1,026.62, 2,061.38) |
| Multivariable-adjusted hazard ratio                         | 1.00 (ref)            | 1.38 (1.16, 1.65)    | 1.46 (1.17, 1.83)    | 1.54 (1.16, 2.04)    | 1.34 (0.95, 1.89)    |
| + age at initiation                                         | 1.00 (ref)            | 1.37 (1.15, 1.64)    | 1.46 (1.17, 1.82)    | 1.52 (1.14, 2.01)    | 1.31 (0.93, 1.85)    |
| + pack-years under the age of 70y                           | 1.00 (ref)            | 1.31 (1.09, 1.57)    | 1.30 (1.02, 1.66)    | 1.29 (0.94, 1.77)    | 1.12 (0.77, 1.64)    |

**Appendix**  
**Cigarette Smoking and Mortality in Adults Aged 70 Years and Older: Results From the NIH-AARP Cohort**  
**Nash et al.**

|                                     |                 |                   |                   |                   |                   |
|-------------------------------------|-----------------|-------------------|-------------------|-------------------|-------------------|
| Death from stroke                   |                 |                   |                   |                   |                   |
| Number of deaths (%)                | 53 (1.4)        | 41 (1.3)          | 25 (1.8)          | 8 (1.1)           | 5 (1.1)           |
|                                     | 224.08          | 218.73            | 327               | 218.3             | 193.37            |
| Rate per 100,000                    | (163.7, 284.47) | (151.59, 285.88)  | (198.34, 455.66)  | (65.19, 371.41)   | (19.62, 367.11)   |
| Multivariable-adjusted hazard ratio | 1.00 (ref)      | 0.98 (0.65, 1.47) | 1.45 (0.9, 2.34)  | 0.93 (0.44, 1.96) | 0.80 (0.32, 2.02) |
| + age at initiation                 | 1.00 (ref)      | 0.98 (0.65, 1.48) | 1.43 (0.89, 2.31) | 0.95 (0.45, 2)    | 0.86 (0.34, 2.17) |
| + pack-years under the age of 70y   | 1.00 (ref)      | 0.9 (0.59, 1.37)  | 1.19 (0.7, 2.03)  | 0.69 (0.3, 1.59)  | 0.60 (0.22, 1.64) |

<sup>a</sup>NIH-AARP: National Institutes of Health-AARP Study

<sup>b</sup>Multivariable-adjusted hazard ratios adjusted for age at baseline, sex, education level, and alcohol use

<sup>c</sup>Other smoking cancers to include all other cancers determined by the Surgeon General's report to be causally associated with cancer, including bladder, esophageal, stomach, head and neck, colorectal, kidney and renal pelvis, and pancreatic cancers, and acute myeloid leukemia.
